# Supplementary material for: Bacterial and Fungal Infections Promote the Bone Erosion Progression in Acquired Cholesteatoma Revealed by Metagenomic Next-Generation Sequencing
Source: Front Microbiol. 2021 Nov 5;12:761111. doi: 10.3389/fmicb.2021.761111 (PMC8604023; doi:10.3389/fmicb.2021.761111)
Supplement: Supplementary file 2 [file Data_Sheet_2.xlsx]

## Sheet: Sheet1
TaxID	Name	ChineseName	Rank	ReadsAccum	RPM	Ratio(%)	Coverage(%)	GenusName	GenusReadsAccum	Frequency	MainType	SubType	Interest
48736	Ralstonia	罗尔斯顿菌属	G	1527	56.52	0.01 %	NA	Ralstonia	1527	11/12	Core	Bacteria	--
190721	Ralstonia insidiosa	危险罗尔斯顿菌	S	1111	41.12	0.00 %	1.35 %	Ralstonia	1527	11/12	Core	Bacteria	--
329	Ralstonia pickettii	皮氏罗尔斯顿菌	S	218	8.07	0.00 %	0.22 %	Ralstonia	1527	8/12	Core	Bacteria	--
105219	Ralstonia mannitolilytica	解甘露醇罗尔斯顿菌	S	12	0.44	0.00 %	0.02 %	Ralstonia	1527	3/12	Core	Bacteria	--
1279	Staphylococcus	葡萄球菌属	G	352	13.03	0.00 %	NA	Staphylococcus	352	9/12	Core	Bacteria	--
29385	Staphylococcus saprophyticus	腐生葡萄球菌	S	263	9.73	0.00 %	0.78 %	Staphylococcus	352	4/12	Core	Bacteria	--
1282	Staphylococcus epidermidis	表皮葡萄球菌	S	16	0.59	0.00 %	0.05 %	Staphylococcus	352	5/12	Core	Bacteria	--
1290	Staphylococcus hominis	人葡萄球菌	S	8	0.3	0.00 %	0.03 %	Staphylococcus	352	4/12	Core	Bacteria	--
29380	Staphylococcus caprae	山羊葡萄球菌	S	3	0.11	0.00 %	0.01 %	Staphylococcus	352	5/12	Core	Bacteria	--
1283	Staphylococcus haemolyticus	溶血葡萄球菌	S	2	0.07	0.00 %	< 0.01 %	Staphylococcus	352	4/12	Core	Bacteria	--
29388	Staphylococcus capitis	头状葡萄球菌	S	1	0.04	0.00 %	< 0.01 %	Staphylococcus	352	5/12	Core	Bacteria	--
1280	Staphylococcus aureus	金黄色葡萄球菌	S	1	0.04	0.00 %	< 0.01 %	Staphylococcus	352	8/12	Core	Bacteria	--
1286	Staphylococcus simulans	模仿葡萄球菌	S	1	0.04	0.00 %	< 0.01 %	Staphylococcus	352	3/12	Core	Bacteria	--
1292	Staphylococcus warneri	沃氏葡萄球菌	S	1	0.04	0.00 %	< 0.01 %	Staphylococcus	352	3/12	Core	Bacteria	--
407	Methylobacterium	甲基杆菌属	G	276	10.22	0.00 %	NA	Methylobacterium	276	7/12	Core	Bacteria	--
270351	Methylobacterium aquaticum	水生甲基杆菌	S	3	0.11	0.00 %	< 0.01 %	Methylobacterium	276	1/12	Core	Bacteria	--
31998	Methylobacterium radiotolerans	耐辐射甲基杆菌	S	2	0.07	0.00 %	< 0.01 %	Methylobacterium	276	2/12	Core	Bacteria	--
39956	Methylobacterium mesophilicum	嗜中温甲基杆菌	S	1	0.04	0.00 %	< 0.01 %	Methylobacterium	276	2/12	Core	Bacteria	--
32008	Burkholderia	伯克霍尔德氏菌属	G	102	3.78	0.00 %	NA	Burkholderia	102	8/12	Core	Bacteria	--
87882	Burkholderia cepacia complex	洋葱伯克霍尔德氏菌群	G1	84	3.11	0.00 %	NA	Burkholderia	102	8/12	Core	Bacteria	--
488447	Burkholderia contaminans	污染伯克霍尔德氏菌	S	65	2.41	0.00 %	0.06 %	Burkholderia	102	8/12	Core	Bacteria	--
28450	Burkholderia pseudomallei	类鼻疽伯克霍尔德氏菌	S	1	0.04	0.00 %	< 0.01 %	Burkholderia	102	2/12	Core	Bacteria	--
13687	Sphingomonas	鞘氨醇单胞菌属	G	73	2.7	0.00 %	NA	Sphingomonas	73	5/12	Core	Bacteria	--
13689	Sphingomonas paucimobilis	少动鞘氨醇单胞菌	S	3	0.11	0.00 %	0.01 %	Sphingomonas	73	2/12	Core	Bacteria	--
93064	Sphingomonas koreensis	韩国鞘氨醇单胞菌	S	3	0.11	0.00 %	< 0.01 %	Sphingomonas	73	3/12	Core	Bacteria	--
1330546	Pluralibacter	Pluralibacter	G	69	2.55	0.00 %	NA	Pluralibacter	69	2/12	Core	Bacteria	--
61647	Pluralibacter gergoviae	日勾维肠杆菌	S	69	2.55	0.00 %	0.09 %	Pluralibacter	69	2/12	Core	Bacteria	--
57493	Kocuria	库克氏菌属	G	40	1.48	0.00 %	NA	Kocuria	40	7/12	Core	Bacteria	--
1275	Kocuria rosea	玫瑰色库克氏菌	S	35	1.3	0.00 %	0.07 %	Kocuria	40	5/12	Core	Bacteria	--
71999	Kocuria palustris	沼泽库克氏菌	S	2	0.07	0.00 %	0.01 %	Kocuria	40	3/12	Core	Bacteria	--
72000	Kocuria rhizophila	嗜根库克氏菌	S	1	0.04	0.00 %	< 0.01 %	Kocuria	40	1/12	Core	Bacteria	--
469	Acinetobacter	不动杆菌属	G	39	1.44	0.00 %	NA	Acinetobacter	39	8/12	Core	Bacteria	--
108981	Acinetobacter schindleri	申氏不动杆菌	S	13	0.48	0.00 %	0.03 %	Acinetobacter	39	1/12	Core	Bacteria	--
40214	Acinetobacter johnsonii	约氏不动杆菌	S	10	0.37	0.00 %	0.02 %	Acinetobacter	39	5/12	Core	Bacteria	--
108980	Acinetobacter ursingii	乌尔新不动杆菌	S	3	0.11	0.00 %	0.01 %	Acinetobacter	39	1/12	Core	Bacteria	--
28090	Acinetobacter lwoffii	鲁氏不动杆菌	S	3	0.11	0.00 %	0.01 %	Acinetobacter	39	4/12	Core	Bacteria	--
40215	Acinetobacter junii	琼氏不动杆菌	S	2	0.07	0.00 %	< 0.01 %	Acinetobacter	39	2/12	Core	Bacteria	--
487316	Acinetobacter soli	索利不动杆菌	S	1	0.04	0.00 %	< 0.01 %	Acinetobacter	39	1/12	Core	Bacteria	--
471	Acinetobacter calcoaceticus	乙酸钙不动杆菌	S	1	0.04	0.00 %	< 0.01 %	Acinetobacter	39	1/12	Core	Bacteria	--
1716	Corynebacterium	棒状杆菌属	G	38	1.41	0.00 %	NA	Corynebacterium	38	6/12	Core	Bacteria	--
43990	Corynebacterium segmentosum	Corynebacterium segmentosum	S	2	0.07	0.00 %	0.01 %	Corynebacterium	38	4/12	Core	Bacteria	--
169292	Corynebacterium aurimucosum	粘金色棒状杆菌	S	1	0.04	0.00 %	< 0.01 %	Corynebacterium	38	3/12	Core	Bacteria	--
475	Moraxella	莫拉氏菌属	G	19	0.7	0.00 %	NA	Moraxella	19	5/12	Core	Bacteria	--
34062	Moraxella osloensis	奥斯陆莫拉氏菌	S	19	0.7	0.00 %	0.05 %	Moraxella	19	5/12	Core	Bacteria	--
286	Pseudomonas	假单胞菌属	G	18	0.67	0.00 %	NA	Pseudomonas	18	7/12	Core	Bacteria	--
316	Pseudomonas stutzeri	施氏假单胞菌	S	3	0.11	0.00 %	< 0.01 %	Pseudomonas	18	5/12	Core	Bacteria	--
287	Pseudomonas aeruginosa	铜绿假单胞菌	S	2	0.07	0.00 %	< 0.01 %	Pseudomonas	18	3/12	Core	Bacteria	--
294	Pseudomonas fluorescens	荧光假单胞菌	S	2	0.07	0.00 %	< 0.01 %	Pseudomonas	18	2/12	Core	Bacteria	--
300	Pseudomonas mendocina	门多萨假单胞菌	S	2	0.07	0.00 %	< 0.01 %	Pseudomonas	18	1/12	Core	Bacteria	--
303	Pseudomonas putida	恶臭假单胞菌	S	2	0.07	0.00 %	< 0.01 %	Pseudomonas	18	3/12	Core	Bacteria	--
47885	Pseudomonas oryzihabitans	栖稻假单胞菌	S	1	0.04	0.00 %	< 0.01 %	Pseudomonas	18	3/12	Core	Bacteria	--
312306	Pseudomonas entomophila	嗜虫假单胞菌	S	1	0.04	0.00 %	< 0.01 %	Pseudomonas	18	1/12	Core	Bacteria	--
283	Comamonas	丛毛单胞菌属	G	18	0.67	0.00 %	NA	Comamonas	18	2/12	Core	Bacteria	--
32013	Comamonas terrigena	土生丛毛单胞菌	S	15	0.56	0.00 %	0.02 %	Comamonas	18	2/12	Core	Bacteria	--
285	Comamonas testosteroni	睾丸酮丛毛单胞菌	S	1	0.04	0.00 %	< 0.01 %	Comamonas	18	1/12	Core	Bacteria	--
149698	Massilia	马赛菌属	G	17	0.63	0.00 %	NA	Massilia	17	3/12	Core	Bacteria	--
1269	Micrococcus	微球菌属	G	11	0.41	0.00 %	NA	Micrococcus	11	5/12	Core	Bacteria	--
1270	Micrococcus luteus	藤黄微球菌	S	11	0.41	0.00 %	0.03 %	Micrococcus	11	5/12	Core	Bacteria	--
2282523	Methylorubrum	Methylorubrum	G	10	0.37	0.00 %	NA	Methylorubrum	10	2/12	Core	Bacteria	--
223967	Methylorubrum populi	Methylorubrum populi	S	3	0.11	0.00 %	< 0.01 %	Methylorubrum	10	2/12	Core	Bacteria	--
106589	Cupriavidus	贪铜菌属	G	8	0.3	0.00 %	NA	Cupriavidus	8	4/12	Core	Bacteria	--
119219	Cupriavidus metallidurans	耐金属贪铜菌	S	6	0.22	0.00 %	0.01 %	Cupriavidus	8	4/12	Core	Bacteria	--
32207	Rothia	罗斯氏菌属	G	8	0.3	0.00 %	NA	Rothia	8	1/12	Core	Bacteria	--
43675	Rothia mucilaginosa	粘滑罗斯氏菌	S	2	0.07	0.00 %	0.01 %	Rothia	8	1/12	Core	Bacteria	--
2047	Rothia dentocariosa	龋齿罗斯氏菌	S	1	0.04	0.00 %	< 0.01 %	Rothia	8	1/12	Core	Bacteria	--
1883	Streptomyces	链霉菌属	G	7	0.26	0.00 %	NA	Streptomyces	7	4/12	Core	Bacteria	--
80865	Delftia	戴尔福特菌属	G	6	0.22	0.00 %	NA	Delftia	6	2/12	Core	Bacteria	--
180282	Delftia tsuruhatensis	Delftia tsuruhatensis	S	2	0.07	0.00 %	< 0.01 %	Delftia	6	2/12	Core	Bacteria	--
1301	Streptococcus	链球菌属	G	6	0.22	0.00 %	NA	Streptococcus	6	6/12	Core	Bacteria	--
1305	Streptococcus sanguinis	血链球菌	S	1	0.04	0.00 %	< 0.01 %	Streptococcus	6	2/12	Core	Bacteria	--
482	Neisseria	奈瑟菌属	G	5	0.19	0.00 %	NA	Neisseria	5	3/12	Core	Bacteria	--
28449	Neisseria subflava	微黄奈瑟菌	S	2	0.07	0.00 %	0.01 %	Neisseria	5	1/12	Core	Bacteria	--
1578	Lactobacillus	乳杆菌属	G	5	0.19	0.00 %	NA	Lactobacillus	5	3/12	Core	Bacteria	--
47770	Lactobacillus crispatus	卷曲乳杆菌	S	5	0.19	0.00 %	0.02 %	Lactobacillus	5	2/12	Core	Bacteria	--
33882	Microbacterium	微杆菌属	G	5	0.19	0.00 %	NA	Microbacterium	5	4/12	Core	Bacteria	--
104336	Microbacterium foliorum	叶片微杆菌	S	2	0.07	0.00 %	< 0.01 %	Microbacterium	5	2/12	Core	Bacteria	--
82380	Microbacterium oxydans	氧化微杆菌	S	2	0.07	0.00 %	< 0.01 %	Microbacterium	5	2/12	Core	Bacteria	--
1827	Rhodococcus	红球菌属	G	4	0.15	0.00 %	NA	Rhodococcus	4	4/12	Core	Bacteria	--
1833	Rhodococcus erythropolis	红串红球菌	S	2	0.07	0.00 %	< 0.01 %	Rhodococcus	4	2/12	Core	Bacteria	--
1912216	Cutibacterium	Cutibacterium	G	4	0.15	0.00 %	NA	Cutibacterium	4	3/12	Core	Bacteria	--
1747	Cutibacterium acnes	痤疮丙酸杆菌	S	2	0.07	0.00 %	< 0.01 %	Cutibacterium	4	2/12	Core	Bacteria	--
33011	Cutibacterium granulosum	颗粒丙酸杆菌	S	2	0.07	0.00 %	0.01 %	Cutibacterium	4	2/12	Core	Bacteria	--
613	Serratia	沙雷氏菌属	G	3	0.11	0.00 %	NA	Serratia	3	4/12	Core	Bacteria	--
615	Serratia marcescens	粘质沙雷氏菌	S	3	0.11	0.00 %	< 0.01 %	Serratia	3	4/12	Core	Bacteria	--
165779	Anaerococcus	厌氧球菌属	G	3	0.11	0.00 %	NA	Anaerococcus	3	3/12	Core	Bacteria	--
33034	Anaerococcus prevotii	普氏厌氧球菌	S	3	0.11	0.00 %	< 0.01 %	Anaerococcus	3	3/12	Core	Bacteria	--
1654	Actinomyces	放线菌属	G	3	0.11	0.00 %	NA	Actinomyces	3	2/12	Core	Bacteria	--
178339	Pauljensenia hongkongensis	香港放线菌	S	1	0.04	0.00 %	< 0.01 %	Pauljensenia	3	1/12	Core	Bacteria	--
544580	Actinomyces oris	口腔放线菌	S	1	0.04	0.00 %	< 0.01 %	Actinomyces	3	1/12	Core	Bacteria	--
338	Xanthomonas	黄单胞菌属	G	2	0.07	0.00 %	NA	Xanthomonas	2	2/12	Core	Bacteria	--
339	Xanthomonas campestris	野油菜黄单胞菌	S	1	0.04	0.00 %	< 0.01 %	Xanthomonas	2	1/12	Core	Bacteria	--
528	Ochrobactrum	苍白杆菌属	G	2	0.07	0.00 %	NA	Ochrobactrum	2	3/12	Core	Bacteria	--
529	Ochrobactrum anthropi	人苍白杆菌	S	1	0.04	0.00 %	< 0.01 %	Ochrobactrum	2	1/12	Core	Bacteria	--
93217	Pandoraea	潘多拉菌属	G	2	0.07	0.00 %	NA	Pandoraea	2	3/12	Core	Bacteria	--
93220	Pandoraea pnomenusa	Pandoraea pnomenusa	S	1	0.04	0.00 %	< 0.01 %	Pandoraea	2	3/12	Core	Bacteria	--
1016	Capnocytophaga	二氧化碳噬纤维菌属	G	2	0.07	0.00 %	NA	Capnocytophaga	2	2/12	Core	Bacteria	--
1019	Capnocytophaga sputigena	生痰二氧化碳嗜纤维菌	S	1	0.04	0.00 %	< 0.01 %	Capnocytophaga	2	2/12	Core	Bacteria	--
1017	Capnocytophaga gingivalis	牙龈二氧化碳嗜纤维菌	S	1	0.04	0.00 %	< 0.01 %	Capnocytophaga	2	1/12	Core	Bacteria	--
838	Prevotella	普雷沃菌属	G	2	0.07	0.00 %	NA	Prevotella	2	3/12	Core	Bacteria	--
28129	Prevotella denticola	栖牙普雷沃氏菌	S	1	0.04	0.00 %	< 0.01 %	Prevotella	2	2/12	Core	Bacteria	--
28132	Prevotella melaninogenica	产黑素普雷沃氏菌	S	1	0.04	0.00 %	< 0.01 %	Prevotella	2	2/12	Core	Bacteria	--
53457	Janibacter	两面神菌属	G	2	0.07	0.00 %	NA	Janibacter	2	2/12	Core	Bacteria	--
262209	Janibacter melonis	瓜两面神菌	S	1	0.04	0.00 %	< 0.01 %	Janibacter	2	2/12	Core	Bacteria	--
857417	Janibacter indicus	印度洋两面神菌	S	1	0.04	0.00 %	< 0.01 %	Janibacter	2	1/12	Core	Bacteria	--
547	Enterobacter	肠杆菌属	G	1	0.04	0.00 %	NA	Enterobacter	1	4/12	Core	Bacteria	--
354276	Enterobacter cloacae complex	阴沟肠杆菌复合群	G1	1	0.04	0.00 %	< 0.01 %	Enterobacter	1	4/12	Core	Bacteria	--
561	Escherichia	埃希氏菌属	G	1	0.04	0.00 %	NA	Escherichia	1	2/12	Core	Bacteria	--
562	Escherichia coli	大肠埃希氏菌	S	1	0.04	0.00 %	< 0.01 %	Escherichia	1	2/12	Core	Bacteria	--
620	Shigella	志贺氏菌属	G	1	0.04	0.00 %	NA	Shigella	1	1/12	Core	Bacteria	--
621	Shigella boydii	鲍氏志贺氏菌	S	1	0.04	0.00 %	< 0.01 %	Shigella	1	1/12	Core	Bacteria	--
53335	Pantoea	泛菌属	G	1	0.04	0.00 %	NA	Pantoea	1	2/12	Core	Bacteria	--
59814	Pantoea dispersa	分散泛菌	S	1	0.04	0.00 %	< 0.01 %	Pantoea	1	1/12	Core	Bacteria	--
724	Haemophilus	嗜血杆菌属	G	1	0.04	0.00 %	NA	Haemophilus	1	2/12	Core	Bacteria	--
729	Haemophilus parainfluenzae	副流感嗜血杆菌	S	1	0.04	0.00 %	< 0.01 %	Haemophilus	1	2/12	Core	Bacteria	--
416916	Aggregatibacter	凝聚杆菌属	G	1	0.04	0.00 %	NA	Aggregatibacter	1	1/12	Core	Bacteria	--
739	Aggregatibacter segnis	惰性凝聚杆菌	S	1	0.04	0.00 %	< 0.01 %	Aggregatibacter	1	1/12	Core	Bacteria	--
414371	Aureimonas	橙单胞菌属	G	1	0.04	0.00 %	NA	Aureimonas	1	1/12	Core	Bacteria	--
370622	Aureimonas altamirensis	阿尔塔米拉橙单胞菌	S	1	0.04	0.00 %	< 0.01 %	Aureimonas	1	1/12	Core	Bacteria	--
125216	Roseomonas	玫瑰单胞菌属	G	1	0.04	0.00 %	NA	Roseomonas	1	2/12	Core	Bacteria	--
207340	Roseomonas mucosa	粘液玫瑰单胞菌	S	1	0.04	0.00 %	< 0.01 %	Roseomonas	1	2/12	Core	Bacteria	--
227873	Pannonibacter	潘隆尼亚碱湖杆菌属	G	1	0.04	0.00 %	NA	Pannonibacter	1	1/12	Core	Bacteria	--
121719	Pannonibacter phragmitetus	栖植物潘隆尼亚碱湖杆菌	S	1	0.04	0.00 %	< 0.01 %	Pannonibacter	1	1/12	Core	Bacteria	--
507	Alcaligenes	产碱杆菌属	G	1	0.04	0.00 %	NA	Alcaligenes	1	3/12	Core	Bacteria	--
511	Alcaligenes faecalis	粪产碱杆菌	S	1	0.04	0.00 %	< 0.01 %	Alcaligenes	1	3/12	Core	Bacteria	--
517	Bordetella	鲍特菌属	G	1	0.04	0.00 %	NA	Bordetella	1	2/12	Core	Bacteria	--
94624	Bordetella petrii	彼氏鲍特菌	S	1	0.04	0.00 %	< 0.01 %	Bordetella	1	1/12	Core	Bacteria	--
47670	Lautropia	劳特普罗氏菌属	G	1	0.04	0.00 %	NA	Lautropia	1	1/12	Core	Bacteria	--
47671	Lautropia mirabilis	奇异劳特普罗氏菌	S	1	0.04	0.00 %	< 0.01 %	Lautropia	1	1/12	Core	Bacteria	--
186928	unclassified Lachnospiraceae	unclassified Lachnospiraceae	F1	1	0.04	0.00 %	NA	unclassified Lachnospiraceae	1	1/12	Extension	Bacteria	--
39491	[Eubacterium] rectale	直肠真杆菌	S	1	0.04	0.00 %	< 0.01 %	unclassified Lachnospiraceae	1	1/12	Core	Bacteria	--
29465	Veillonella	韦荣氏球菌属	G	1	0.04	0.00 %	NA	Veillonella	1	2/12	Core	Bacteria	--
39778	Veillonella dispar	殊异韦荣氏球菌	S	1	0.04	0.00 %	< 0.01 %	Veillonella	1	1/12	Core	Bacteria	--
670516	Mycobacteroides	分枝杆菌属	G	1	0.04	0.00 %	NA	Mycobacteroides	1	1/12	Core	Bacteria	--
1774	Mycobacteroides chelonae	龟分枝杆菌	S	1	0.04	0.00 %	< 0.01 %	Mycobacteroides	1	1/12	Core	Bacteria	--
1866885	Mycolicibacterium	分枝杆菌属	G	1	0.04	0.00 %	NA	Mycolicibacterium	1	1/12	Core	Bacteria	--
1772	Mycolicibacterium smegmatis	耻垢分枝杆菌	S	1	0.04	0.00 %	< 0.01 %	Mycolicibacterium	1	1/12	Core	Bacteria	--
4951	Yarrowia	亚罗酵母属	G	67	2.48	0.00 %	NA	Yarrowia	67	5/12	Core	Fungi	--
4952	Yarrowia lipolytica	解脂耶氏酵母	S	67	2.48	0.00 %	0.02 %	Yarrowia	67	5/12	Core	Fungi	--
5598	Alternaria	链格孢属	G	25	0.93	0.00 %	NA	Alternaria	25	4/12	Core	Fungi	--
5599	Alternaria alternata	交链链格孢	S	15	0.56	0.00 %	< 0.01 %	Alternaria	25	3/12	Core	Fungi	--
156630	Alternaria arborescens	乔木链格孢	S	2	0.07	0.00 %	< 0.01 %	Alternaria	25	1/12	Core	Fungi	--
55193	Malassezia	马拉色菌属	G	15	0.56	0.00 %	NA	Malassezia	15	4/12	Core	Fungi	--
76775	Malassezia restricta	限制性马拉色菌	S	15	0.56	0.00 %	0.01 %	Malassezia	15	4/12	Core	Fungi	--
599737	Wickerhamomyces	威克汉姆酵母属	G	3	0.11	0.00 %	NA	Wickerhamomyces	3	3/12	Core	Fungi	--
4927	Wickerhamomyces anomalus	异常威克汉姆酵母	S	3	0.11	0.00 %	< 0.01 %	Wickerhamomyces	3	3/12	Core	Fungi	--
4930	Saccharomyces	酵母菌属	G	1	0.04	0.00 %	NA	Saccharomyces	1	2/12	Core	Fungi	--
4932	Saccharomyces cerevisiae	酿酒酵母	S	1	0.04	0.00 %	< 0.01 %	Saccharomyces	1	2/12	Core	Fungi	--
4958	Debaryomyces	德巴利酵母属	G	1	0.04	0.00 %	NA	Debaryomyces	1	1/12	Core	Fungi	--
4959	Debaryomyces hansenii	汉逊德巴利酵母	S	1	0.04	0.00 %	< 0.01 %	Debaryomyces	1	1/12	Core	Fungi	--
766728	Meyerozyma	Meyerozyma	G	1	0.04	0.00 %	NA	Meyerozyma	1	1/12	Core	Fungi	--
4929	Meyerozyma guilliermondii	季也蒙毕赤酵母	S	1	0.04	0.00 %	< 0.01 %	Meyerozyma	1	1/12	Core	Fungi	--
5583	Exophiala	外瓶霉属	G	1	0.04	0.00 %	NA	Exophiala	1	1/12	Core	Fungi	--
212818	Exophiala mesophila	Exophiala mesophila	S	1	0.04	0.00 %	< 0.01 %	Exophiala	1	1/12	Core	Fungi	--
5073	Penicillium	青霉属	G	1	0.04	0.00 %	NA	Penicillium	1	2/12	Core	Fungi	--
1108849	Penicillium rubens	产红青霉	S	1	0.04	0.00 %	< 0.01 %	Penicillium	1	2/12	Core	Fungi	--
95729	Stemphylium	匍柄霉属	G	1	0.04	0.00 %	NA	Stemphylium	1	1/12	Core	Fungi	--
183478	Stemphylium lycopersici	番茄匍柄霉	S	1	0.04	0.00 %	< 0.01 %	Stemphylium	1	1/12	Core	Fungi	--
5543	Trichoderma	木霉属	G	1	0.04	0.00 %	NA	Trichoderma	1	2/12	Core	Fungi	--
63577	Trichoderma atroviride	深绿木霉	S	1	0.04	0.00 %	< 0.01 %	Trichoderma	1	1/12	Core	Fungi	--
